# Supplementary material for: Complete Chloroplast Genome Sequence of a Major Warm-Season Turfgrass Species, Centipedegrass [Eremochloa ophiuroides (Munro) Hack.]: Genome Characterization, Comparative and Phylogenetic Analysis
Source: Research Square preprint supplement (doi:10.21203/rs.3.rs-152684/v1), 2021-01-26
Supplement: Supplementary file 1 [file 12482638b622c26baa1e2a24.xlsx]

## Sheet: Sheet1
Table 2 Summary of gene annotation for the E. ophiuroide cp genome
Category	Gene group	Gene name
Photosynthesis	Subunits of photosystem I	psaA, psaB, psaC, psaI, psaJ
	Subunits of photosystem II	psbA, psbB, psbC, psbD, psbE, psbF, psbH, psbI, psbJ, psbK, psbL, psbM, psbN, psbT, psbZ
	Subunits of NADH dehydrogenase	ndhA*, ndhB*(2), ndhC, ndhD, ndhE, ndhF, ndhG, ndhH, ndhI, ndhJ, ndhK
	Subunits of cytochrome b/f complex	petA, petB*, petD*, petG, petL, petN
	Subunits of ATP synthase	atpA, atpB, atpE, atpF*, atpH, atpI
	Large subunit of rubisco	rbcL
Self-replication	Proteins of large ribosomal subunit	rpl14, rpl16*, rpl2*(2), rpl20, rpl22, rpl23(2), rpl32, rpl33, rpl36
	Proteins of small ribosomal subunit	rps11, rps12**(2), rps14, rps15(2), rps16*, rps18, rps19(2), rps2, rps3, rps4, rps7(2), rps8
	Subunits of RNA polymerase	rpoA, rpoB, rpoC1, rpoC2
	Ribosomal RNAs	rrn16(2), rrn23(2), rrn4.5(2), rrn5(2)
	Transfer RNAs	trnA-UGC*(2), trnC-GCA, trnD-GUC, trnE-UUC, trnF-GAA, trnG-GCC, trnG-UCC*, trnH-GUG(2), trnI-CAU(2), trnI-GAU*(2), trnK-UUU*, trnL-CAA(2), trnL-UAA*, trnL-UAG, trnM-CAU, trnN-GUU(2), trnP-UGG, trnQ-UUG, trnR-ACG(2), trnR-UCU, trnS-GCU, trnS-GGA, trnS-UGA, trnT-GGU, trnT-UGU, trnV-GAC(2), trnV-UAC*, trnW-CCA, trnY-GUA, trnfM-CAU
Other genes	Maturase	matK
	Protease	clpP
	Envelope membrane protein	cemA
	c-type cytochrome synthesis gene	ccsA
	Translation initiation factor	infA
Genes of unknown function	Conserved hypothetical chloroplast ORF	ycf2(2), ycf3**, ycf4
* Gene with one introns, **Gene with two introns, (2) Number of copies of multi-copy genes
