# Supplementary material for: Complete Chloroplast Genome Sequence of a Major Warm-Season Turfgrass Species, Centipedegrass [Eremochloa ophiuroides (Munro) Hack.]: Genome Characterization, Comparative and Phylogenetic Analysis
Source: Research Square preprint supplement (doi:10.21203/rs.3.rs-152684/v1), 2021-01-26
Supplement: Supplementary file 2 [file 351a06195199970b4675da3b.xlsx]

## Sheet: Sheet1
Supplementary Table 2 Statistics of forward repeats, palindromic repeats and reverse repeats in the E. ophiuroides chloroplast genome
Type	Number	Size (bp)	Position 1	Position 2	Gene	Region
Forward repeats	1	242	58314	136749	IGS;rpl23	LSC;IRa
	2	65	28613	28778	rpoC2;rpoC2	LSC;LSC
	3	57	28621	28786	rpoC2;rpoC2	LSC;LSC
	4	52	103694	117442	IGS	IRb;IRa
	5	41	67236	67278	rps18;rps18	LSC;LSC
	6	38	12842	38151	trnfM-CAU;IGS	LSC;LSC
	7	37	28594	28930	rpoC2;rpoC2	LSC;LSC
	8	37	67292	67313	rps18;rps18	LSC;LSC
	9	37	67229	67313	rps18;rps18	LSC;LSC
	10	36	13945	83861	IGS;rpl2	LSC;IRb
	11	36	45005	92766	ycf3;IGS	LSC;IRb
	12	35	88166	132987	IGS	IRb;IRa
	13	34	40161	42385	psaB;psaA	LSC;LSC
	14	34	67250	67313	rps18;rps18	LSC;LSC
	15	33	28757	28838	rpoC2;rpoC2	LSC;LSC
	16	32	28724	28778	rpoC2;rpoC2	LSC;LSC
	17	32	28759	28930	rpoC2;rpoC2	LSC;LSC
	18	32	67259	67301	rps18;rps18	LSC;LSC
	19	31	28840	28930	rpoC2;rpoC2	LSC;LSC
	20	31	28594	28840	rpoC2;rpoC2	LSC;LSC
	21	30	4138	4168	IGS	LSC;LSC
	22	30	28670	28733	rpoC2;rpoC2	LSC;LSC
	23	30	89767	131391	ndhB;ndhB	IRb;IRa
	24	30	28552	28573	rpoC2;rpoC2	LSC;LSC
	25	30	49682	49703	IGS	LSC;LSC
	26	30	53569	53591	IGS	LSC;LSC
	27	30	67278	67320	rps18;rps18	LSC;LSC
	28	30	103721	117469	IGS	IRb;IRa
	29	30	107221	107246	IGS	SSC;SSC
Palindromic repeats	1	22230	82081	116877	/	/
	2	242	58314	84197	IGS;rpl23	LSC;IRb
	3	52	103694	103694	IGS	IRb;IRb
	4	52	117442	117442	IGS	IRa;IRa
	5	38	73284	73284	petB;petB	LSC;LSC
	6	36	7817	46467	trnS-GCU;trnS-GGA	LSC;LSC
	7	36	13945	137291	IGS;rpl2	LSC;IRa
	8	36	45005	128386	ycf3;IGS	LSC;IRa
	9	35	88166	88166	IGS	IRb;IRb
	10	35	132987	132987	IGS	IRa;IRa
	11	33	14759	21777	IGS;rpoB	LSC;LSC
	12	33	58773	58822	IGS	LSC;LSC
	13	32	11465	46474	trnS-UGA;trnS-GGA	LSC;LSC
	14	31	15760	47706	trnT-GGU;trnT-UGU	LSC;LSC
	15	31	18208	18225	IGS	LSC;LSC
	16	30	18108	18108	psbM;psbM	LSC;LSC
	17	30	67678	67678	rps18;rps18	LSC;LSC
	18	30	89767	89767	ndhB;ndhB	IRb;IRb
	19	30	131391	131391	ndhB;ndhB	IRa;IRa
	20	30	34378	111283	IGS	LSC;SSC
Reverse repeats	1	33	20225	20225	IGS	LSC;LSC
	2	30	49291	49294	IGS	LSC;LSC
